# Supplementary material
Source: publisher figshare collection journal article supplement (https://geolsoc.figshare.com/ndownloader/files/14413295)
Supplement: Supplementary file 1 [file 14413295]

## Sheet: Sheet1
	Table ES1 Ch13. Tuffaceous sediments XRD data for tuffaceous sediments
		N17-2	N17-12	N17-55	N17-66	N17-106	N17-108	N17-117	N17-153	N17-155	N17-186	N17-192	30296
		loc. 10	loc. 12	loc 5	loc. 3	loc. 8	loc. 8	loc. 9	loc. 4	loc. 4	loc. 7	loc. 11	loc. 9
	Quartz	32.7	50.4	32.2	11.21	56.3	45.5	35.3	25.7	38.7	16.38	39.5	25.5
	Calcite	0.62	0.122	0.38	0	0.01	0.2	0.36	0	0	0.79	0.09	0.04
	Dolomite	0.25	0	0.25	0.35	0	0.29	0.45	0.36	0.6	0.28	0	0.59
	Pyrite	0.04	0.05	0	0.42	0.141	0.018	0.084	0	0.146	0	0.15	0
	Albite	8.23	3.35	12.04	33.1	9.7	12.8	20.2	40.9	24.5	24.7	15.3	56.6
	Anorthite	3.9	3.78	3.19	1.25	5.77	4.8	17.5	3.27	2.68	4.79	9.6	9.27
	Gypsum	0.31	0.022	0.22	0.01	0.53	0.33	0.34	0.46	0.47	0.132	0.2	0.24
	illite_90144	1.53	1.09	2.88	4.22	5.45	9.38	2.75	4.01	13.75	0.98	8.1	1.54
	Kaolinite (BISH)	0.66	0.59	1.82	2.27	3.61	1.18	1.84	2.08	2.76	0.31	3.85	0.45
	Chlorite IIb	1.48	0.2	2.65	4.98	2.31	2.02	0.51	2	3.11	0.56	1.97	0.33
	Siderite	0.036	0.032	0	0	0	0.021	0.183	0.002	0	0	0.29	0.012
	Microcline maximum	1.9	0	1.79	4.7	2.93	8.13	11.5	8.66	1.18	1.92	6.43	2.02
	Orthoclase	0.48	0	0	0.39	1.33	3.48	4.3	4.07	0.36	0.97	3.82	0.46
	Muscovite 2M1	2.11	0.58	3.44	3.09	5.95	7.32	1.75	4.53	6.82	0.89	7.5	1.65
	Ankerite Fe0.55	0.14	0.06	0.01	0.21	0	0.21	0.66	0.85	1.12	0	0	0.16
	Epidote	0.88	0.33	1.14	33.5	0	0	0	0	0	0	0	0
	Laumontite	44.1	39.7	37.9	0	5.2	3.65	1.03	1.94	2.96	47	1.63	0.75
	Analcime	39	0	0	0	0	0	0	0	0	0	0	0
	Rutile	0	0	0	0	0.59	0.46	0.78	0.5	0.26	0.3	0.74	0.174
	Anatase	0	0	0	0	0.2	0.2	0.4	0.7	0.5	0	0.7	0.2
	Total	100	99.9	100.1	99.9	100.021	99.989	99.937	100.032	99.916	100	99.87	99.986
